# Supplementary material
Source: HighWire-hosted journal article supplement (https://qdcxjkg.com/highwire/filestream/113830/field_highwire_adjunct_files/0/SLawManu_SupplementR1.pdf)
Supplement: SLawManu_SupplementR1.pdf [file SLawManu_SupplementR1.pdf]

| <b>Supplement Table 1. Patient and health system TB treatment related costs. *</b> |                        |           |                           |
|------------------------------------------------------------------------------------|------------------------|-----------|---------------------------|
| <b>Variable</b>                                                                    | <b>Base-Case Value</b> | <b>SD</b> | <b>Source</b>             |
| <b>Hourly wage (INT\$) §</b>                                                       | 3.14                   | 0         | World Bank [1]            |
| <b>Health system costs</b>                                                         |                        |           |                           |
| <i>Cost per outpatient visit (INT\$)</i>                                           | 20.40                  | 20.67     | HFQ (see methods)         |
| <i>Cost per DOT/pill-collection visit (INT\$)</i>                                  | 6.79                   | 7.88      | HFQ (see methods)         |
| <i>Cost per inpatient bed-day (INT\$)</i>                                          | 123.82                 | 229.75    | HFQ (see methods)         |
| Initial Std                                                                        | 13.62                  | 0         | Global Drug Facility      |
| Initial EMB                                                                        | 18.28                  | 0         | Global Drug Facility      |
| Retreat Std                                                                        | 35.77                  | 0         | Global Drug Facility      |
| Retreat Str                                                                        | 157.05                 | 0         | Global Drug Facility      |
| MDR Std                                                                            | 637.60                 | 0         | Global Drug Facility      |
| <b>Patient visits and costs during pre-treatment period</b>                        |                        |           |                           |
| <i>Average number of outpatient visits per patient</i>                             | 4.8                    | 4.3       | PCQ                       |
| <i>Average direct cost per outpatient visit (INT\$)</i>                            | 40.84                  | 52.23     | PCQ                       |
| <i>Average time lost per outpatient visit (hours)</i>                              | 3.91                   | 4.61      | PCQ                       |
| <i>Average total cost per outpatient visit (INT\$)</i>                             | 53.12                  | 54.20     | PCQ                       |
| <b>Patient visits and costs during treatment period</b>                            |                        |           |                           |
| <i>Number of DOT/pill-collection visits per patient</i>                            |                        |           |                           |
| Initial Std/Initial EMB                                                            | 88                     | 0         | WHO [2]                   |
| Retreat Std/Retreat Str                                                            | 120                    | 0         | WHO [2]                   |
| MDR Std                                                                            | 500                    | 0         | 5 days/week for 23 months |
| <i>Number of outpatient/follow-up visits per patient</i>                           |                        |           |                           |
| Initial Std/Initial EMB                                                            | 6                      | 0         | Assumed 1 visit/month     |
| Retreat Std/Retreat Str                                                            | 8                      | 0         | Assumed 1 visit/month     |
| MDR Std                                                                            | 23                     | 0         | Assumed 1 visit/month     |
| <i>Average direct cost per DOT/pill-collection visit (INT\$)</i>                   | 1.83                   | 6.69      | PCQ                       |
| <i>Average time lost per DOT/pill-collection visit (hours)</i>                     | 0.8                    | 1.1       | PCQ                       |
| <i>Average total cost per DOT/pill-collection visit (\$)</i>                       | 4.35                   | 7.54      | PCQ                       |
| <b>Patient visits and costs during treatment period (cont'd)</b>                   |                        |           |                           |
| <i>Average direct cost per outpatient/follow-up visit (INT\$)</i>                  | 13.29                  | 36.73     | PCQ                       |
| <i>Average time lost per outpatient/follow-up visit (hours)</i>                    | 1.8                    | 4.6       | PCQ                       |
| <i>Average total cost per outpatient/follow-up visit (\$)</i>                      | 18.86                  | 39.47     | PCQ                       |

| <b>Patient bed-days and costs during hospitalization period</b>              |          |          |                     |
|------------------------------------------------------------------------------|----------|----------|---------------------|
| <i>Average number of bed-days per patient (days)</i>                         |          |          |                     |
| Non-MDR regimen <sup>⌘</sup>                                                 | 16.3     | 28.2     | PCQ                 |
| MDR Std                                                                      | 43.8     | 24.6     | PCQ                 |
| <i>Average direct cost per inpatient bed-day (INT\$)</i>                     | 1.83     | 6.69     | PCQ                 |
| <i>Average family time lost per inpatient bed-day (hours)</i>                | 3.47     | 5.08     | PCQ                 |
| <b>Patient bed-days and costs during hospitalization period (continued.)</b> |          |          |                     |
| <i>Average patient time lost per inpatient bed-day (hours)</i>               | 8        | 0        | Assumed 8h workdays |
| <i>Average total cost per inpatient bed-day (hours)</i>                      | 55.92    | 29.10    | PCQ                 |
| <b>Total treatment-related costs per patient</b>                             |          |          |                     |
| Initial Std                                                                  | 4530.04  | 5391.73  | (see methods)       |
| Initial EMB                                                                  | 4534.71  | 5391.73  | (see methods)       |
| Retreat Std                                                                  | 4987.51  | 5469.73  | (see methods)       |
| Retreat Str                                                                  | 5108.79  | 5469.73  | (see methods)       |
| MDR Std                                                                      | 15341.82 | 11989.62 | (see methods)       |

\*All costs are expressed at 2010 international US dollars (INT\$), which is the PPP-adjusted value of local currency converted into US dollars, and are taken from surveys and data in Ecuador. PCQ = Patient cost questionnaire; HFQ = Health facility cost questionnaire.

§ Hourly wages are based on average working hours of 48h/week

⌘ Non-MDR regimens include: standardized initial regimen (*Initial Std*), initial regimen with EMB (*Initial EMB*), 1<sup>st</sup>-line retreatment regimen (*Retreat Std*) and 1<sup>st</sup>/2<sup>nd</sup>-line Retreatment regimen (*Retreat Str*).

| <b>Supplement Table 2. Additional sensitivity analyses †</b>                                          |                                                             |                                                             |                                                       |
|-------------------------------------------------------------------------------------------------------|-------------------------------------------------------------|-------------------------------------------------------------|-------------------------------------------------------|
| <b>Treatment Strategy</b>                                                                             | <b>Cost per MDR case Averted (INT\$) Range (low-high) ⌘</b> | <b>Cost per TB Death averted (INT\$) Range (low-high) ⌘</b> | <b>Cost per DALY gained (INT\$) Range (low-high)⌘</b> |
| <b><u>S2A: Probability of blindness after 6-8 months treatment with EMB (0.0% – 0.6%)</u></b>         |                                                             |                                                             |                                                       |
| <i>5% Mono-INH resistant TB; 1% MDR-TB</i>                                                            |                                                             |                                                             |                                                       |
| Standard                                                                                              | (ref)                                                       | (ref)                                                       | (ref)                                                 |
| EMB-Initial                                                                                           | Always dominant                                             | Always dominant                                             | Dominant to less effective (>0.1%)                    |
| Str-Retreat                                                                                           | Always dominant                                             | Always dominant                                             | Always dominant                                       |
| MDR-Failures                                                                                          | 588,854 – 583,956                                           | 47,108 – 47,348                                             | 5,744 – 5,753                                         |
| <i>15% Mono-INH resistant TB; 1% MDR-TB</i>                                                           |                                                             |                                                             |                                                       |
| Standard                                                                                              | (ref)                                                       | (ref)                                                       | (ref)                                                 |
| EMB-Initial                                                                                           | Always dominant                                             | Always dominant                                             | Dominant to less effective (>0.1%)                    |
| Str-Retreat                                                                                           | Always dominant                                             | Always dominant                                             | Always dominant                                       |
| MDR-Failures                                                                                          | 723,470 – 717,458                                           | 40,193 – 39,859                                             | 4,861 – 4,859                                         |
| <i>5% Mono-INH resistant TB; 10% MDR-TB</i>                                                           |                                                             |                                                             |                                                       |
| Standard                                                                                              | (ref)                                                       | (ref)                                                       | (ref)                                                 |
| EMB-Initial                                                                                           | Always dominant                                             | Always dominant                                             | Dominant to less effective (>0.1%)                    |
| Str-Retreat                                                                                           | Always dominant                                             | Always dominant                                             | Always dominant                                       |
| MDR-Failures                                                                                          | 2,967,543 – 2,943,036                                       | 23,515 – 23,357                                             | 2,862 – 2,850                                         |
| <i>15% Mono-INH resistant TB; 10% MDR-TB</i>                                                          |                                                             |                                                             |                                                       |
| Standard                                                                                              | (ref)                                                       | (ref)                                                       | (ref)                                                 |
| EMB-Initial                                                                                           | Always dominant                                             | Always dominant                                             | Dominant to less effective (>0.1%)                    |
| Str-Retreat                                                                                           | Always dominant                                             | Always dominant                                             | Always dominant                                       |
| MDR-Failures                                                                                          | 2,607,569 – 2,586,032                                       | 23,527 – 23,368                                             | 2,864 – 2,852                                         |
| <b><u>S2B: Relative efficacy of Initial EMB regimen compared to Initial Std (1.3– 4.0 times)*</u></b> |                                                             |                                                             |                                                       |
| <i>5% Mono-INH resistant TB; 1% MDR-TB</i>                                                            |                                                             |                                                             |                                                       |
| Standard                                                                                              | (ref)                                                       | (ref)                                                       | (ref)                                                 |
| EMB-Initial                                                                                           | Always dominant                                             | Always dominant                                             | Always less effective                                 |
| Str-Retreat                                                                                           | Always dominant                                             | Always dominant                                             | Always dominant                                       |
| MDR-Failures                                                                                          | 586,978 – 586,978                                           | 46,988 – 46,988                                             | 5,745 – 5,745                                         |
| <i>15% Mono-INH resistant TB; 1% MDR-TB</i>                                                           |                                                             |                                                             |                                                       |
| Standard                                                                                              | (ref)                                                       | (ref)                                                       | (ref)                                                 |
| EMB-Initial                                                                                           | Always dominant                                             | Always dominant                                             | Less effective to dominant (>2.7)                     |
| Str-Retreat                                                                                           | Always dominant                                             | Always dominant                                             | Always dominant                                       |
| MDR-Failures                                                                                          | 721,168 – 721,168                                           | 39,697 – 39,697                                             | 4,867 – 4,867                                         |
| <i>5% Mono-INH resistant TB; 10% MDR-TB</i>                                                           |                                                             |                                                             |                                                       |

|                                              |                       |                 |                                   |
|----------------------------------------------|-----------------------|-----------------|-----------------------------------|
| Standard                                     | (ref)                 | (ref)           | (ref)                             |
| EMB-Initial                                  | Always dominant       | Always dominant | Always less effective             |
| Str-Retreat                                  | Always dominant       | Always dominant | Always dominant                   |
| MDR-Failures                                 | 2,958,162 – 2,958,162 | 23,477-23,477   | 2,857-2,857                       |
| <i>15% Mono-INH resistant TB; 10% MDR-TB</i> |                       |                 |                                   |
| Standard                                     | (ref)                 | (ref)           | (ref)                             |
| EMB-Initial                                  | Always dominant       | Always dominant | Less effective to dominant (>2.9) |
| Str-Retreat                                  | Always dominant       | Always dominant | Always dominant                   |
| MDR-Failures                                 | 2,599,325 – 2,599,325 | 23,488 – 23,488 | 2,860 – 2,860                     |

**S2C: Relative efficacy of Retreat Str compared to Retreat Std retreatment (1.3 – 4.0times)\***

*5% Mono-INH resistant TB; 1% MDR-TB*

|              |                           |                           |                          |
|--------------|---------------------------|---------------------------|--------------------------|
| Standard     | (ref)                     | (ref)                     | (ref)                    |
| EMB-Initial  | Always dominant           | Always dominant           | Always less effective    |
| Str-Retreat  | 14,565 to dominant (>2.0) | 40,052 to dominant (>2.0) | 5,826 to dominant (>2.0) |
| MDR-Failures | 586,978 – 586,978         | 46,958 -46,958            | 5,745 – 5,745            |

*15% Mono-INH resistant TB; 1% MDR-TB*

|              |                   |                 |                       |
|--------------|-------------------|-----------------|-----------------------|
| Standard     | (ref)             | (ref)           | (ref)                 |
| EMB-Initial  | Always dominant   | Always dominant | Always less effective |
| Str-Retreat  | Always dominant   | Always dominant | Always dominant       |
| MDR-Failures | 721,168 – 721,168 | 39,697 – 39,697 | 4,867 – 4,867         |

*5% Mono-INH resistant TB; 10% MDR-TB*

|              |                           |                           |                          |
|--------------|---------------------------|---------------------------|--------------------------|
| Standard     | (ref)                     | (ref)                     | (ref)                    |
| EMB-Initial  | Always dominant           | Always dominant           | Always less effective    |
| Str-Retreat  | 13,767 to dominant (>1.9) | 34,417 to dominant (>1.9) | 4,831 to dominant (>1.9) |
| MDR-Failures | 2,958,162 – 2,958,162     | 23,478 – 23,478           | 2,857 – 2,857            |

*15% Mono-INH resistant TB; 10% MDR-TB*

|              |                       |                 |                       |
|--------------|-----------------------|-----------------|-----------------------|
| Standard     | (ref)                 | (ref)           | (ref)                 |
| EMB-Initial  | Always dominant       | Always dominant | Always less effective |
| Str-Retreat  | Always dominant       | Always dominant | Always dominant       |
| MDR-Failures | 2,599,325 – 2,599,325 | 23,488 – 23,488 | 2,860 – 2,860         |

**S2D: Duration of hospitalization during standardized MDR treatment (0 – 6 months)**

*5% Mono-INH resistant TB; 1% MDR-TB*

|              |                        |                         |                        |
|--------------|------------------------|-------------------------|------------------------|
| Standard     | (ref)                  | (ref)                   | (ref)                  |
| EMB-Initial  | Always dominant        | Always dominant         | Always less effective  |
| Str-Retreat  | 7,929 to dominant (>1) | 19,517 to dominant (>1) | 2,788 to dominant (>1) |
| MDR-Failures | 190,956 – 2,558,634    | 15,276 – 204,691        | 1,869 – 25,044         |

*15% Mono-INH resistant TB; 1% MDR-TB*

|              |                     |                  |                       |
|--------------|---------------------|------------------|-----------------------|
| Standard     | (ref)               | (ref)            | (ref)                 |
| EMB-Initial  | Always dominant     | Always dominant  | Always less effective |
| Str-Retreat  | Always dominant     | Always dominant  | Always dominant       |
| MDR-Failures | 222,039 – 3,206,153 | 12,222 – 176,485 | 1,499 – 21,639        |

|                                                    |                        |                         |                        |
|----------------------------------------------------|------------------------|-------------------------|------------------------|
| <i>5% Mono-INH resistant TB; 10% MDR-TB</i>        |                        |                         |                        |
| Standard                                           | (ref)                  | (ref)                   | (ref)                  |
| EMB-Initial                                        | Always dominant        | Always dominant         | Always less effective  |
| Str-Retreat                                        | 7,386 to dominant (>1) | 17,045 to dominant (>1) | 2,435 to dominant (>1) |
| MDR-Failures                                       | 687,158 – 14,264,687   | 5,454 – 113,212         | 664 – 13,777           |
| <i>15% Mono-INH resistant TB; 10% MDR-TB</i>       |                        |                         |                        |
| Standard                                           | (ref)                  | (ref)                   | (ref)                  |
| EMB-Initial                                        | Always dominant        | Always dominant         | Always less effective  |
| Str-Retreat                                        | Always dominant        | Always dominant         | Always dominant        |
| MDR-Failures                                       | 603,716 – 12,534,759   | 5,455 – 113,266         | 664 – 13,790           |
| <b>S2E: Using WHO-recommended discount rates</b> ◆ |                        |                         |                        |
| <i>5% Mono-INH resistant TB; 1% MDR-TB</i>         |                        |                         |                        |
| Standard                                           | (ref)                  | (ref)                   | (ref)                  |
| EMB-Initial                                        | Dominant               | Dominant                | Less effective         |
| Str-Retreat                                        | 1,774                  | 3,903                   | 552                    |
| MDR-Failures                                       | 669,808                | 48,537                  | 4,651                  |
| <i>15% Mono-INH resistant TB; 1% MDR-TB</i>        |                        |                         |                        |
| Standard                                           | (ref)                  | (ref)                   | (ref)                  |
| EMB-Initial                                        | Dominant               | Dominant                | Less effective         |
| Str-Retreat                                        | Dominant               | Dominant                | Dominant               |
| MDR-Failures                                       | 687,391                | 40,835                  | 3,951                  |
| <i>5% Mono-INH resistant TB; 10% MDR-TB</i>        |                        |                         |                        |
| Standard                                           | (ref)                  | (ref)                   | (ref)                  |
| EMB-Initial                                        | Dominant               | Dominant                | Less effective         |
| Str-Retreat                                        | Dominant               | Dominant                | Dominant               |
| MDR-Failures                                       | 2,848,846              | 23,701                  | 2,358                  |
| <i>15% Mono-INH resistant TB; 10% MDR-TB</i>       |                        |                         |                        |
| Standard                                           | (ref)                  | (ref)                   | (ref)                  |
| EMB-Initial                                        | Dominant               | Dominant                | Less effective         |
| Str-Retreat                                        | Dominant               | Dominant                | Dominant               |
| MDR-Failures                                       | 2,503,256              | 23,690                  | 2,359                  |

†A strategy was dominant if it was more effective and less costly. The ICER ranges correspond to results when the input parameter is varied from low to high. If the incremental cost-effectiveness changes from a number to either “dominant” or “less effective”, or vice versa, the threshold values of the corresponding input parameter are indicated in parentheses.

⌘ Ecuador treatment costs were used for estimating the average cost.

\*For details on efficacy assumptions, see Methods.

◆ WHO recommends annual discounting of 6% for costs and 0% for health outcomes

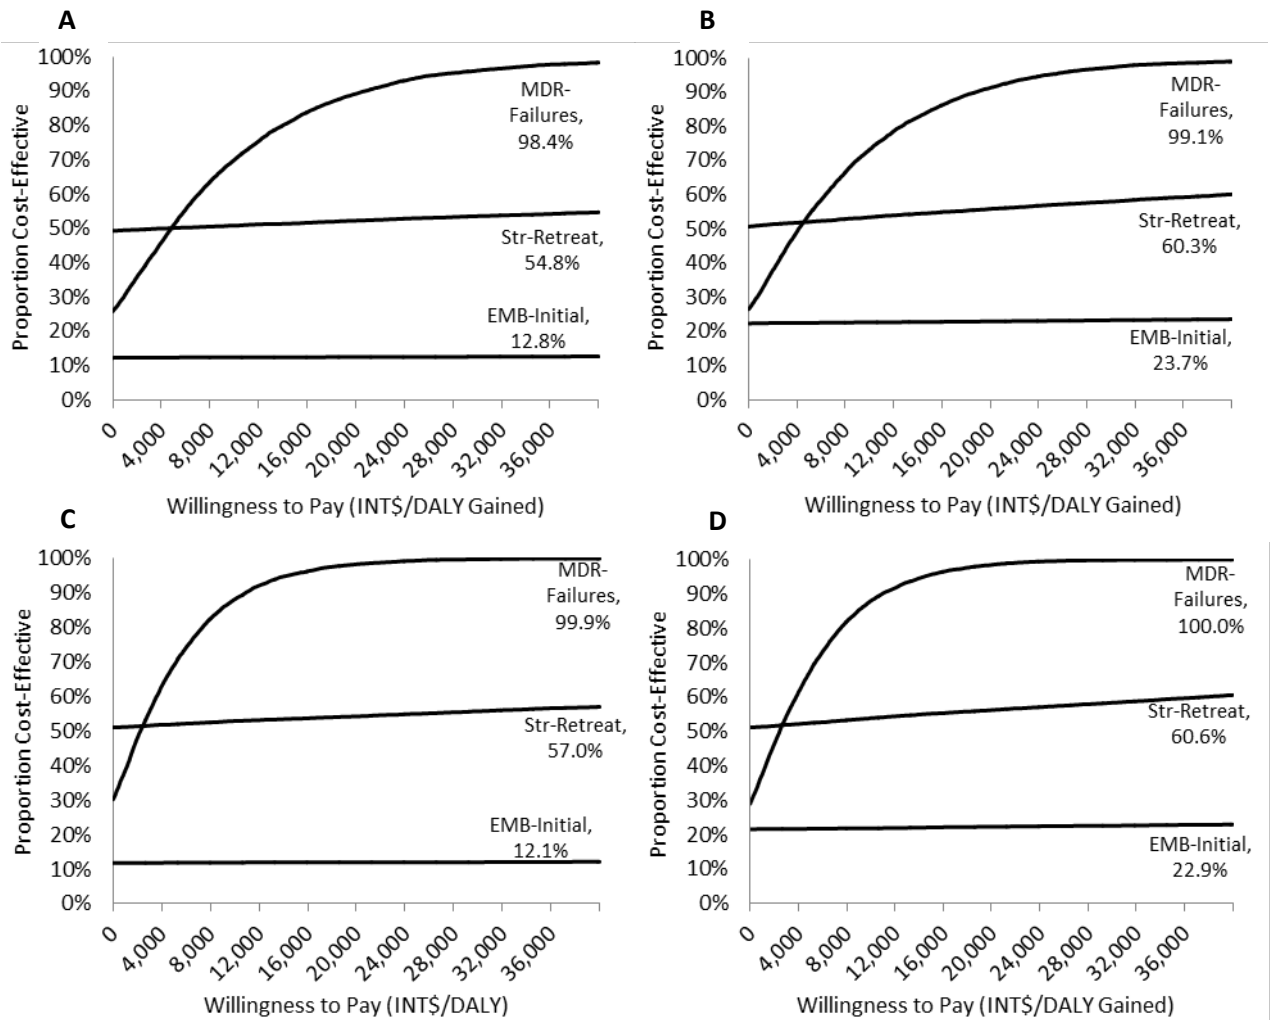

**Supplement Figure 1. Cost-effectiveness acceptability curves of individual treatment strategies in four hypothetical settings**

Results from PSA performed using 10,000 second-order Monte Carlo simulation trials are represented in three cost-effectiveness acceptability curves, each compares one of three individual treatment strategies (*EMB-Initial*, *Str-Retreat* and *MDR-Failures*) to *Standard*. The four settings are: **A**) 5% mono-INH resistant TB, 1% MDR-TB; **B**) 15% mono-INH resistant TB, 1% MDR-TB; **C**) 5% mono-INH resistant TB, 10% MDR-TB; and **D**) 15% mono-INH resistant TB, 10% MDR-TB. Depending on the willingness to pay or threshold ICER (INT\$/DALY Gained), the curves show the likelihood that each strategy would be cost-effective compared to *Standard*.

## References

1. World Bank. World Development Indicators database. World Bank, Washington, DC, 2010.
2. WHO. Treatment of tuberculosis: guidelines - 4th ed. Geneva: World Health Organization; 2010. Report No.: WHO/HTM/TB/2009.420.
